# Supplementary material for: Implications of Persistent Pain in Patients With Rheumatoid Arthritis Despite Remission Status: Data From the KOBIO Registry
Source: PubMed Central journal article supplement — J Rheum Dis. 2022 Jun 30;29(4):215–22. doi: 10.4078/jrd.22.0005 (PMC10351409; doi:10.4078/jrd.22.0005), 2022-06-30
Supplement: jrd-29-4-215-supple.pdf [file jrd-29-4-215-supple.pdf]

**Supplementary Table 1.** Baseline clinical characteristics of enrolled patients

| Characteristics                        | All patients with DAS28 <2.6 at first year follow up (n=680) | Patients with DAS28 <2.6 and VAS-pain ≥4 (n=146) | Patients with DAS28 <2.6 and VAS-pain <4 (n=534) | p-value |
|----------------------------------------|--------------------------------------------------------------|--------------------------------------------------|--------------------------------------------------|---------|
| Age (yr)                               | 53.0±13.0                                                    | 54.4±13.5                                        | 52.7±12.8                                        | 0.057   |
| Female                                 | 553 (81.3)                                                   | 121 (82.9)                                       | 432 (80.9)                                       | 0.587   |
| Marital status, married                | 598 (87.9)                                                   | 125 (85.6)                                       | 473 (88.6)                                       | 0.330   |
| Smoking history                        |                                                              |                                                  |                                                  | 0.986   |
| Ex-smoker                              | 63 (9.3)                                                     | 13 (8.9)                                         | 50 (9.3)                                         |         |
| Current smoker                         | 42 (6.2)                                                     | 9 (6.2)                                          | 33 (6.2)                                         |         |
| Never                                  | 575 (84.5)                                                   | 124 (84.9)                                       | 451 (84.5)                                       |         |
| BMI (kg/m <sup>2</sup> )               | 22.5±3.2                                                     | 22.5±3.5                                         | 22.6±3.1                                         | 0.396   |
| Disease duration (yr)                  | 8.3±7.4                                                      | 10.0±9.1                                         | 7.9±6.9                                          | 0.015   |
| Tender joint count*                    | 7.6±5.9                                                      | 7.1±5.8                                          | 7.8±5.9                                          | 0.072   |
| Swollen joint count*                   | 6.1±5.0                                                      | 5.8±5.3                                          | 6.2±4.9                                          | 0.197   |
| ESR (mm/h)*                            | 39.0 (23.0~56.0)                                             | 38.5 (23.3~49.8)                                 | 39.0 (23.0~57.0)                                 | 0.213   |
| CRP (mg/dL)*                           | 1.3 (0.5~2.8)                                                | 1.1 (0.5~2.6)                                    | 1.4 (0.5~2.9)                                    | 0.145   |
| Rheumatoid factor (positivity) (n=657) | 534/657 (81.3)                                               | 111/141 (78.7)                                   | 423/516 (82.0)                                   | 0.380   |
| Anti-CCP antibody (positivity) (n=581) | 479/581 (82.4)                                               | 103/125 (82.4)                                   | 376/456 (82.5)                                   | 0.988   |
| Pain VAS*                              | 6.0 (5.0~8.0)                                                | 7.0 (5.0~8.0)                                    | 6.0 (5.0~8.0)                                    | <0.001  |
| Physician's GA*                        | 7.0 (5.0~8.0)                                                | 6.0 (5.0~8.0)                                    | 7.0 (5.0~8.0)                                    | 0.065   |
| Patient's GA*                          | 7.0 (6.0~8.0)                                                | 7.0 (6.0~9.0)                                    | 7.0 (6.0~8.0)                                    | 0.103   |
| CDAI *                                 | 25.0 (20.0~31.0)                                             | 23.5 (18.0~30.8)                                 | 25.0 (20.0~31.0)                                 | 0.048   |
| EQ-VAS (n=10)*                         | 7.0 (4.5~8.0)                                                | 7.0 (5.0~7.5)                                    | 7.0 (5.0~8.0)                                    | 0.857   |
| RAPID3*                                | 15.3 (11.0~19.0)                                             | 12.8 (16.7~19.7)                                 | 15.0 (10.7~18.7)                                 | 0.001   |
| Presence of hand erosions (n=583)      | 201/583 (34.5)                                               | 47/121 (38.8)                                    | 154/462 (33.3)                                   | 0.256   |
| Presence of foot erosions (n=431)      | 150/431 (34.8)                                               | 43/89 (48.3)                                     | 107/342 (31.3)                                   | 0.003   |

Data are presented as number (%), mean±standard deviation, or median (interquartile range), unless otherwise indicated. DAS28: disease activity score of 28 joints, VAS: visual analog scale, BMI: body mass index, ESR: erythrocyte sedimentation rate, CRP: C-reactive protein, CCP: cyclic citrullinated peptide, GA: global assessment, CDAI: clinical disease activity index, EQ-VAS: EuroQol visual analog scale, RAPID3: routine assessment of patient index data 3. Continuous data were assessed by independent t-test, and categorical data were analyzed by chi-square test. \*These data were assessed by Mann-Whitney U-test.

**Supplementary Table 2.** Baseline medication, extraarticular manifestations, and comorbidities of enrolled patients

| Characteristics              | All patients with DAS28 <2.6 at first year follow up (n=680) | Patients with DAS28 <2.6 and VAS-pain ≥4 (n=146) | Patients with DAS28 <2.6 and VAS-pain <4 (n=534) | p-value |
|------------------------------|--------------------------------------------------------------|--------------------------------------------------|--------------------------------------------------|---------|
| <b>Previous treatment</b>    |                                                              |                                                  |                                                  |         |
| Prior use of methotrexate    | 650 (95.6)                                                   | 137 (93.8)                                       | 513 (96.1)                                       | 0.245   |
| Prior use of biologic agents | 159 (23.4)                                                   | 45 (30.8)                                        | 114 (21.3)                                       | 0.017   |
| <b>Current treatment</b>     |                                                              |                                                  |                                                  |         |
| bDMARDs or tsDMARDs          |                                                              |                                                  |                                                  | 0.001   |
| Anti-TNF                     | 270 (39.7)                                                   | 53 (36.3)                                        | 217 (40.6)                                       |         |
| Rituximab                    | 3 (0.4)                                                      | 0 (0.0)                                          | 3 (0.6)                                          |         |
| Tocilizumab                  | 294 (43.2)                                                   | 82 (56.2)                                        | 212 (39.7)                                       |         |
| Abatacept                    | 63 (22.5)                                                    | 7 (4.8)                                          | 56 (10.5)                                        |         |
| JAKis                        | 50 (7.4)                                                     | 4 (2.7)                                          | 46 (8.6)                                         |         |
| Corticosteroid use           | 444 (65.3)                                                   | 116 (79.5)                                       | 328 (61.4)                                       | <0.001  |
| Concomitant cDMARDs use      | 598 (87.9)                                                   | 126 (86.3)                                       | 472 (88.4)                                       | 0.492   |
| <b>Comorbidities*</b>        |                                                              |                                                  |                                                  |         |
| Cardiovascular disorders     | 258 (37.9)                                                   | 67 (45.9)                                        | 191 (35.8)                                       | 0.026   |
| Neurological disorders       | 13 (1.9)                                                     | 7 (4.8)                                          | 6 (1.1)                                          | 0.004   |
| Pulmonary disorders          | 26 (3.8)                                                     | 3 (2.1)                                          | 23 (4.3)                                         | 0.209   |
| Endocrine disorders          | 243 (35.7)                                                   | 62 (42.5)                                        | 181 (33.9)                                       | 0.055   |
| Renal disorders              | 5 (0.7)                                                      | 3 (2.1)                                          | 2 (0.4)                                          | 0.069   |
| Gastrointestinal disorders   | 20 (2.9)                                                     | 3 (2.1)                                          | 17 (3.2)                                         | 0.590   |
| Viral/infectious disorders   | 28 (4.1)                                                     | 7 (4.8)                                          | 21 (3.9)                                         | 0.642   |
| Drug abuse/dependence        | 1 (0.1)                                                      | 0 (0.0)                                          | 1 (0.2)                                          | 0.999   |
| Mental illness               | 12 (1.8)                                                     | 6 (4.1)                                          | 6 (1.1)                                          | 0.015   |
| Hematology & Oncology        | 277 (40.7)                                                   | 64 (43.8)                                        | 213 (39.9)                                       | 0.390   |

Data are presented as number (%). DAS28: disease activity score of 28 joints, VAS: visual analog scale, bDMARDs: biologic disease modifying anti-rheumatic drugs, tsDMARDs: targeted synthetic DMARDs, TNF: tumor necrosis factor, JAKis: janus kinase inhibitors, cDMARDs: conventional DMARDs. \*These data were assessed by chi-square test or Fisher exact test due to low frequency.
